# Supplementary material for: Regulation of antigen-specific T cell infiltration and spatial architecture in multiple myeloma and premalignancy
Source: PubMed Central journal article supplement (PMC10378152; doi:10.1172/jci167629), 2023-08-01
Supplement: jci-133-167629-s010.pdf [file jci-133-167629-s010.pdf]

Supplemental Table 1. Clinical Characteristics

| Patient Characteristics    |                  |                |      |
|----------------------------|------------------|----------------|------|
|                            |                  | N = 70         | %    |
| Median Age , range (years) |                  | 58.8 (31.2-79) |      |
| Gender                     | Male             | 40             | 57.1 |
|                            | Female           | 30             | 42.9 |
| Race                       | White            | 43             | 61.4 |
|                            | Black            | 24             | 34.3 |
|                            | Asian            | 3              | 4.3  |
| Risk                       | Standard         | 50             | 71.4 |
|                            | High             | 20             | 28.6 |
|                            | t(4;14)          | 6              | 8.6  |
|                            | t(14;16)         | 8              | 11.4 |
|                            | t(11;14)         | 13             | 18.6 |
|                            | del 17p          | 8              | 11.4 |
|                            | amp 1q           | 24             | 34.3 |
| Isotype                    | IgG              | 43             | 61.4 |
|                            | IgA              | 10             | 14.3 |
|                            | IgM              | 1              | 1.4  |
|                            | Light chain only | 15             | 21.4 |
|                            | Non-secretory    | 1              | 1.4  |
| ISS                        | stage I          | 25             | 35.7 |
|                            | stage II         | 19             | 27.1 |
|                            | stage III        | 12             | 17.1 |
|                            | Missing          | 14             | 20   |
| Induction Therapy          | RVD              | 69             | 98.6 |
|                            | VDD              | 1              | 1.4  |
| Stem cell Transplant       | Yes              | 60             | 85.7 |
|                            | No               | 10             | 14.3 |
| Maintenance Therapy        | Yes              | 64             | 91.4 |
|                            | No               | 6              | 8.6  |

Abbreviations: RVD: Revlimid, velcade and dexamethasone; VDD: Velcade, daratumumab and dexamethasone; ISS: International staging system
